# Supplementary material
Source: publisher figshare collection journal article supplement (https://asha.figshare.com/articles/dataset/_/28200128)
Supplement: Supplementary file 1 [file 1]

**Supplemental Material S4.** Grammatical structures examined in the Mandarin Receptive Grammar Test (MRGT), with English as a comparison.

| Grammatical structure examined in Mandarin |                                                                                                                                                                         | English equivalent                                                                                                        | Form-similarity score <sup>a</sup> | Relevant observations    |
|--------------------------------------------|-------------------------------------------------------------------------------------------------------------------------------------------------------------------------|---------------------------------------------------------------------------------------------------------------------------|------------------------------------|--------------------------|
| Simple transitive                          | Subject-Verb-Object                                                                                                                                                     | Subject-Verb-Object                                                                                                       | 2                                  | Grammatical forms match. |
| Ditransitive                               | Verb-recipient-theme (e.g., <i>gei3 ta1 qian2</i> 给他钱)<br>Verb-theme- <i>gei3</i> -recipient (e.g., <i>song4 qian2 gei3 ta1</i> 送钱给他)                                   | Verb-recipient-theme (e.g., <i>give him money</i> )<br>Verb-theme- <i>to</i> -recipient (e.g., <i>send money to him</i> ) | 2                                  | Grammatical forms match. |
| Locative                                   | Using a <u>localizer</u> after a noun to specify the location relative to the noun, often with the <u>coverb</u> <i>zai4</i> 在 (e.g., <i>zai4 zhuo1 zi shang4</i> 在桌子上) | Prepositional phrase (e.g., <i>on the desk</i> )                                                                          | 1                                  | Different forms.         |
| Classifier                                 | Numeral/Demonstrative-Classifier-Noun (e.g., <i>yi1/zhe4-tiao2-sheng2</i> 一/这条绳 ‘a/this rope’)                                                                          | N/A                                                                                                                       | 0                                  | No equivalent structure. |
| Pronoun                                    | 1 <sup>st</sup> , 2 <sup>nd</sup> and 3 <sup>rd</sup> person pronouns without gender and case distinctions                                                              | 1 <sup>st</sup> , 2 <sup>nd</sup> and 3 <sup>rd</sup> person pronouns with gender and case distinctions                   | 1                                  | Different forms.         |
| Bare reflexive                             | <i>Zi4ji3</i> 自己 ‘self’                                                                                                                                                 | N/A                                                                                                                       | 0                                  | No equivalent structure. |
| Negation                                   | Negative marker (e.g., <i>mei2</i> 没, <i>bu4</i> 不) placed before the verb                                                                                              | Adding “not” after an auxiliary or modal verb (e.g., <i>do not</i> )                                                      | 1                                  | Different forms.         |
| Resultative verb compound                  | Combining a verb with a resultative complement to indicate the result or                                                                                                | N/A                                                                                                                       | 0                                  | No equivalent structure. |

|                          |                                                                                                                                                               |                                                                                                                                           |   |                          |
|--------------------------|---------------------------------------------------------------------------------------------------------------------------------------------------------------|-------------------------------------------------------------------------------------------------------------------------------------------|---|--------------------------|
|                          | outcome of an action (e.g., <i>tui1dao3</i> 推倒, literally ‘push-fall’)                                                                                        |                                                                                                                                           |   |                          |
| Aspect marking           | Optional aspect marking through adding a particle to the verb (e.g., <i>chi1 le</i> 吃了 ‘have eaten’, <i>zai4 chi1</i> 在吃 ‘is eating’)                         | Aspect marked through the use of auxiliary verbs and verb tense                                                                           | 1 | Different forms.         |
| Comparative              | Subject- <i>bi3</i> 比-Compared Object-( <i>geng4</i> 更 ‘more’) Adjective;<br>Subject-Verb- <i>de</i> 得- <i>bi3</i> 比-Compared Object-( <i>geng4</i> 更) Adverb | Subject-Copula/Verb-(more) Adjective/Adverb (-er)- <i>than</i> -Compared Object                                                           | 1 | Different forms.         |
| Coordinating conjunction | Using words such as <i>he2</i> 和 ‘and’ to link elements of equal grammatical status (e.g., <i>nai3nai na2zhe tao2zi he2 ju2zi</i> 奶奶拿着桃子和桔子)                  | Using words such as <i>and</i> to link elements of equal grammatical status (e.g., <i>the granny is holding a peach and a tangerine</i> ) | 2 | Grammatical forms match. |
| Possessive               | Placing the particle <i>de</i> 的 after the processor (e.g., <i>nan2hai2 de</i> 男孩的)                                                                           | Adding an apostrophe followed by the affix -s to the processor (e.g., <i>the boy’s</i> )                                                  | 1 | Different forms.         |
| BA-construction          | NP <sub>Agent</sub> -BA-NP <sub>Patient</sub> -XP                                                                                                             | N/A                                                                                                                                       | 0 | No equivalent structure. |
| BEI-passive              | NP <sub>Patient</sub> -BEI (-NP <sub>Agent</sub> )-XP                                                                                                         | NP <sub>Patient</sub> -BE-Verb (past participle) (- <i>by</i> -NP <sub>Agent</sub> )                                                      | 1 | Different forms.         |
| Relative clause          | Head-final with the particle <i>de</i> 的 linking the relative clause and the head noun (e.g., <i>xiong2mao1-bao4-zhe-de-tu4zi</i> 熊猫抱着的兔子)                    | Head-initial, usually introduced by a relative pronoun (e.g., <i>the rabbit that the panda is holding</i> )                               | 1 | Different forms.         |

<sup>a</sup> 2: equivalent structures and similar forms and word order, 1: equivalent structures but differing forms, 0: no equivalent structure.
