# Supplementary material
Source: publisher figshare collection journal article supplement (https://asha.figshare.com/articles/dataset/_/28200128)
Supplement: Supplementary file 2 [file 1]

**Supplemental Material S2.** Consonant substitutions reflecting Singaporean Mandarin features (Chua, 2003; En et al., 2014) observed in Mandarin–English bilingual preschool children’s Mandarin in the current study.

|                  | Type of substitution      | Example                                            |
|------------------|---------------------------|----------------------------------------------------|
| Syllable initial | Alveolo-palatal→ alveolar | $\widehat{t\epsilon} \rightarrow \widehat{ts}$     |
|                  |                           | $\widehat{t\epsilon^h} \rightarrow \widehat{ts^h}$ |
|                  |                           | $\epsilon \rightarrow s$                           |
|                  | Retroflex → alveolar      | $\widehat{t\zeta} \rightarrow \widehat{ts}$        |
|                  |                           | $\widehat{t\zeta^h} \rightarrow \widehat{ts^h}$    |
|                  |                           | $\zeta \rightarrow s$                              |
| Syllable final   | Velar → alveolar          | $\downarrow \rightarrow l$                         |
|                  |                           | $\eta \rightarrow n$                               |
