# Supplementary material
Source: publisher figshare collection journal article supplement (https://asha.figshare.com/articles/dataset/_/28200128)
Supplement: Supplementary file 3 [file 1]

**Supplemental Material S8.** Linear regression results for Mandarin articulation in 63 Mandarin–English bilingual children.

| Measure                                                           | Initial model |      |       |        | Final model |      |       |        | Full model |      |       |        |
|-------------------------------------------------------------------|---------------|------|-------|--------|-------------|------|-------|--------|------------|------|-------|--------|
|                                                                   | $\beta$       | SE   | $t$   | $p$    | $\beta$     | SE   | $t$   | $p$    | $\beta$    | SE   | $t$   | $p$    |
| (Intercept)                                                       | 1.13          | 0.09 | 12.17 | < .001 | 1.13        | 0.08 | 13.91 | < .001 | 1.13       | 0.08 | 14.23 | < .001 |
| Age (months)                                                      | -0.22         | 0.12 | -1.92 | .06    | -0.12       | 0.10 | -1.14 | .26    | -0.16      | 0.11 | -1.47 | .15    |
| Nonverbal working memory                                          | -0.15         | 0.11 | -1.44 | .15    | -0.04       | 0.10 | -0.37 | .71    | -0.06      | 0.10 | -0.55 | .59    |
| Difference in number of speakers<br>(Mandarin vs. English)        | -0.09         | 0.10 | -0.86 | .40    | -0.04       | 0.10 | -0.38 | .71    | -0.01      | 0.10 | -0.08 | .94    |
| Difference in number of native speakers<br>(Mandarin vs. English) | -0.18         | 0.10 | -1.81 | .08    | -0.10       | 0.09 | -1.11 | .27    | -0.07      | 0.09 | -0.80 | .43    |
| Mandarin receptive vocabulary                                     | —             | —    | —     | —      | -0.22       | 0.11 | -2.07 | .04    | -0.15      | 0.12 | -1.22 | .23    |
| Mandarin receptive grammar                                        | —             | —    | —     | —      | —           | —    | —     | —      | -0.05      | 0.12 | -0.44 | .66    |
| English articulation                                              | —             | —    | —     | —      | 0.32        | 0.09 | 3.47  | < .01  | 0.33       | 0.09 | 3.45  | < .01  |
| English receptive vocabulary                                      | —             | —    | —     | —      | —           | —    | —     | —      | 0.25       | 0.11 | 2.15  | .04    |
| English receptive grammar                                         | —             | —    | —     | —      | —           | —    | —     | —      | -0.20      | 0.12 | -1.65 | .11    |
| $R^2$                                                             | .27           |      |       |        | .46         |      |       |        | .51        |      |       |        |
| Adjusted $R^2$                                                    | .22           |      |       |        | .4          |      |       |        | .43        |      |       |        |

*Note.* Z scores were used for measures. Dependent variable is the square root of MAT raw scores against Singapore Mandarin targets.
