# Supplementary material
Source: publisher figshare collection journal article supplement (https://asha.figshare.com/articles/dataset/_/28200128)
Supplement: Supplementary file 5 [file 1]

**Supplemental Material S9.** Linear regression results for English receptive vocabulary in 63 Mandarin–English bilingual children.

| Measure                                                           | Initial model |      |       |        | Final model |      |       |        | Full model |      |       |        |
|-------------------------------------------------------------------|---------------|------|-------|--------|-------------|------|-------|--------|------------|------|-------|--------|
|                                                                   | $\beta$       | SE   | $t$   | $p$    | $\beta$     | SE   | $t$   | $p$    | $\beta$    | SE   | $t$   | $p$    |
| (Intercept)                                                       | 6.95          | 0.15 | 46.93 | < .001 | 6.95        | 0.12 | 55.71 | < .001 | 6.95       | 0.12 | 55.66 | < .001 |
| Age (months)                                                      | 0.48          | 0.18 | 2.59  | .01    | 0.34        | 0.16 | 2.13  | .04    | 0.32       | 0.17 | 1.96  | .05    |
| Nonverbal working memory                                          | 0.28          | 0.17 | 1.66  | .10    | 0.12        | 0.15 | 0.83  | .41    | 0.17       | 0.16 | 1.10  | .28    |
| Difference in number of speakers<br>(Mandarin vs. English)        | -0.50         | 0.17 | -3.05 | < .01  | -0.38       | 0.14 | -2.69 | .01    | -0.29      | 0.16 | -1.78 | .08    |
| Difference in number of native speakers<br>(Mandarin vs. English) | -0.01         | 0.15 | -0.05 | .96    | -0.04       | 0.13 | -0.28 | .78    | -0.03      | 0.14 | -0.18 | .86    |
| English articulation                                              | —             | —    | —     | —      | —           | —    | —     | —      | -0.29      | 0.17 | -1.73 | .09    |
| English receptive grammar                                         | —             | —    | —     | —      | 0.68        | 0.14 | 4.98  | < .001 | 0.68       | 0.16 | 4.11  | < .001 |
| Mandarin articulation                                             | —             | —    | —     | —      | —           | —    | —     | —      | 0.23       | 0.18 | 1.33  | .19    |
| Mandarin receptive vocabulary                                     | —             | —    | —     | —      | —           | —    | —     | —      | -0.13      | 0.19 | -0.65 | .52    |
| Mandarin receptive grammar                                        | —             | —    | —     | —      | —           | —    | —     | —      | -0.01      | 0.19 | -0.03 | .98    |
| $R^2$                                                             | .27           |      |       |        | .49         |      |       |        | .52        |      |       |        |
| Adjusted $R^2$                                                    | .21           |      |       |        | .44         |      |       |        | .44        |      |       |        |

*Note.* Z scores were used for measures. Dependent variable is the square root of PPVT-4 raw scores.
