# Supplementary material
Source: publisher figshare collection journal article supplement (https://asha.figshare.com/articles/dataset/_/28200128)
Supplement: Supplementary file 6 [file 1]

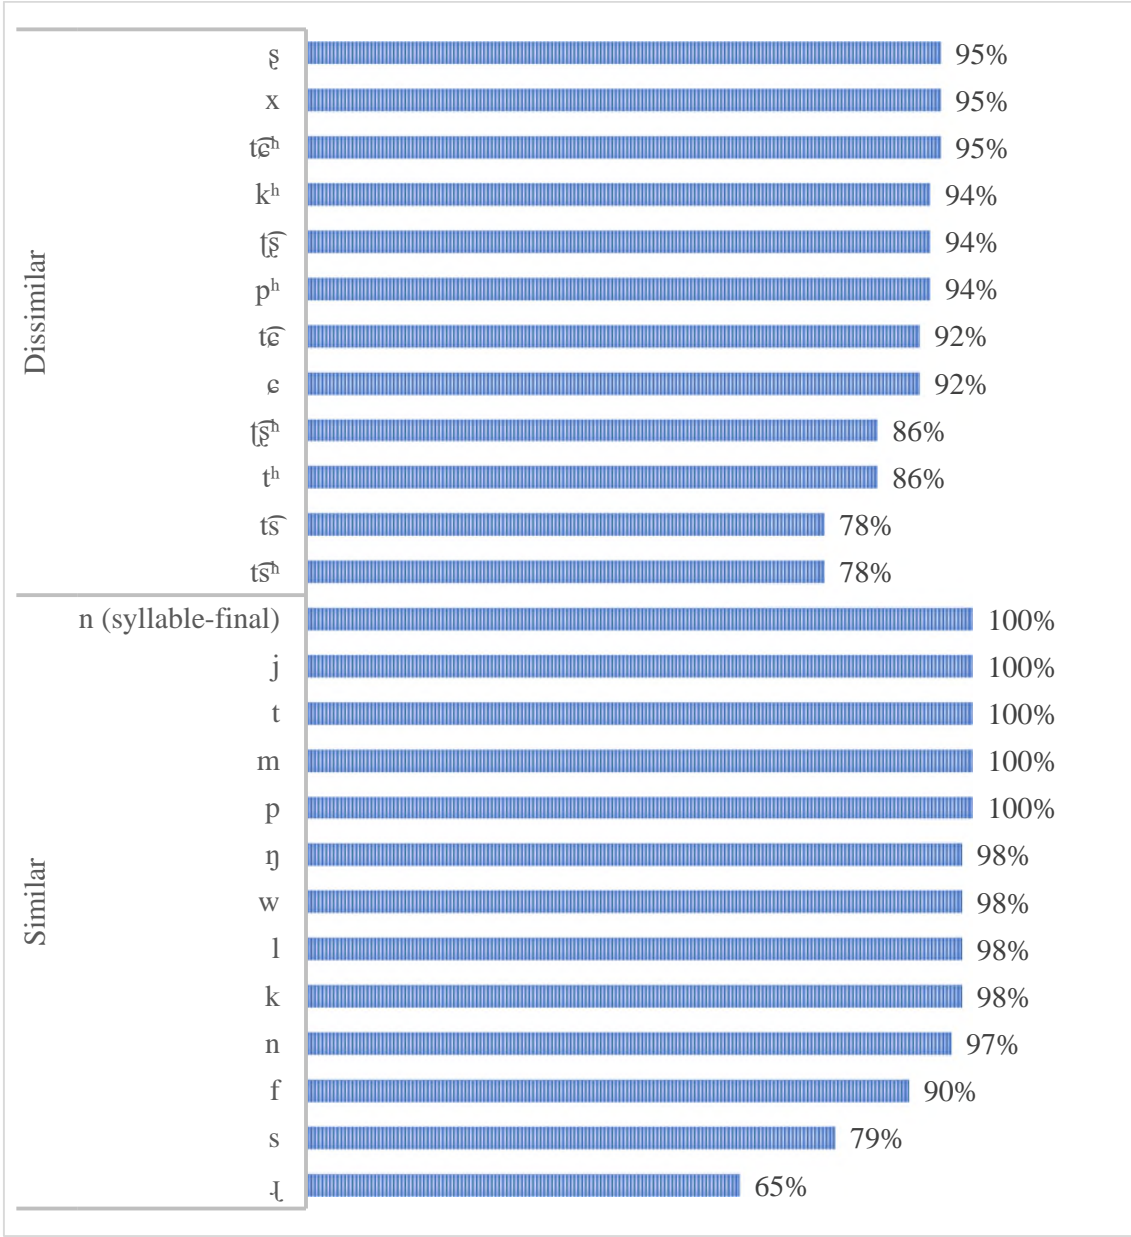

**Supplemental Material S5.** Percentage of Mandarin–English bilingual children ( $N = 63$ ) producing accurate articulation of individual consonants in the Mandarin Articulation Test (MAT). “Similar” refers to consonants that are phonetically similar between Mandarin and English; “Dissimilar” refers to consonants that are unique to Mandarin and unattested in English.
