# Supplementary material
Source: publisher figshare collection journal article supplement (https://asha.figshare.com/articles/dataset/_/28200128)
Supplement: Supplementary file 7 [file 1]

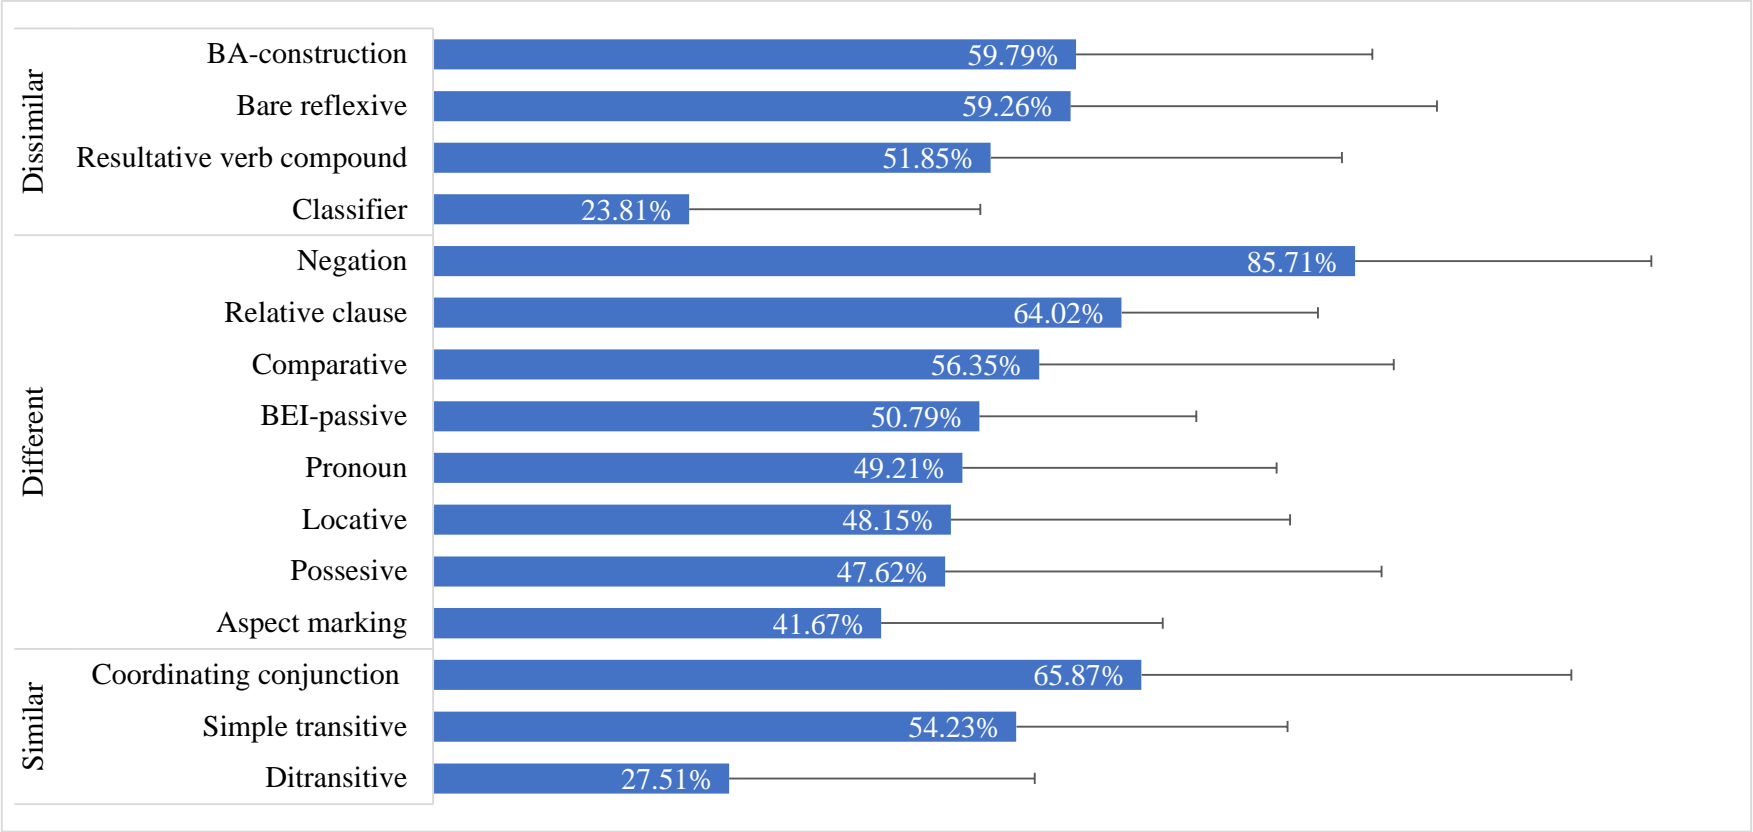

**Supplemental Material S6.** Accuracy rates of structures tested in the Mandarin Receptive Grammar Test (MRGT) among 63 Mandarin–English bilingual children, categorized by grammatical construction type. “Similar” refers to Mandarin constructions with closely matched structural counterparts in English, including word order and form. “Different” denotes Mandarin constructions with structural equivalents in English that exhibit variations in form. “Dissimilar” applies to unique Mandarin constructions lacking structural parallels in English.
