# Supplementary material
Source: publisher figshare collection journal article supplement (https://asha.figshare.com/articles/dataset/_/28200128)
Supplement: Supplementary file 8 [file 1]

**Supplemental Material S3.** Phonological processes associated with Singapore English (SgE) dialect features (En et al., 2014) observed in Mandarin–English bilingual preschool children’s English in the current study.

| Phonological process     | SgE dialect feature                               | Description                                                                                | Examples                                                                                                              |
|--------------------------|---------------------------------------------------|--------------------------------------------------------------------------------------------|-----------------------------------------------------------------------------------------------------------------------|
| Final consonant deletion | Syllable-final /l/ deletion                       | Dark (velarized) [ɫ] deleted after a schwa                                                 | shovel [ʃʌvəl] → [ʃʌvə]                                                                                               |
| Stopping                 | Dental fricatives substitution (syllable-initial) | Stopping in syllable-initial positions for /θ, ð/                                          | thumb [θʌm] → [tʌm]<br>that [ðæt] → [dæt]                                                                             |
| Voicing                  | Syllable-final obstruent devoicing                | Voiced plosives, fricatives and affricates become voiceless in the syllable-final position | web [wɛb] → [wɛp]<br>slide [slaid] → [slait]<br>pig [pɪg] → [pɪk]<br>five [faɪv] → [faɪf]<br>cheese [tʃiːz] → [tʃiːs] |
| /θ/ → [f]                | Dental fricatives substitution (syllable-final)   | [f]-substitution in syllable-final position for /θ/                                        | teeth [tiːθ] → [tiːf]                                                                                                 |
