# Supplementary material
Source: publisher figshare collection journal article supplement (https://asha.figshare.com/articles/dataset/_/28200128)
Supplement: Supplementary file 9 [file 1]

**Supplemental Material S10.** Linear regression results for Mandarin receptive vocabulary in 63 Mandarin–English bilingual children.

| Measure                                                        | Initial model |      |        |        | Final model |      |        |        | Full model |      |        |        |
|----------------------------------------------------------------|---------------|------|--------|--------|-------------|------|--------|--------|------------|------|--------|--------|
|                                                                | $\beta$       | SE   | $t$    | $p$    | $\beta$     | SE   | $t$    | $p$    | $\beta$    | SE   | $t$    | $p$    |
| (Intercept)                                                    | 8.71          | 0.07 | 122.58 | < .001 | 8.71        | 0.06 | 141.90 | < .001 | 8.71       | 0.06 | 138.36 | < .001 |
| Age (months)                                                   | 0.01          | 0.09 | 0.11   | .91    | -0.08       | 0.08 | -1.02  | .31    | -0.07      | 0.09 | -0.84  | .40    |
| Nonverbal working memory                                       | 0.27          | 0.08 | 3.26   | < .01  | 0.19        | 0.07 | 2.54   | .01    | 0.19       | 0.08 | 2.49   | .02    |
| Difference in number of speakers                               | 0.27          | 0.08 | 3.44   | < .01  | 0.23        | 0.07 | 3.34   | < .01  | 0.22       | 0.08 | 2.91   | .01    |
| (Mandarin vs. English)                                         |               |      |        |        |             |      |        |        |            |      |        |        |
| Difference in number of native speakers (Mandarin vs. English) | 0.08          | 0.07 | 1.03   | .31    | -0.04       | 0.07 | -0.52  | .60    | -0.04      | 0.07 | -0.51  | .61    |
| Mandarin articulation                                          | —             | —    | —      | —      | -0.10       | 0.07 | -1.44  | .16    | -0.09      | 0.09 | -0.98  | .33    |
| Mandarin receptive grammar                                     | —             | —    | —      | —      | 0.31        | 0.07 | 4.23   | < .001 | 0.31       | 0.09 | 3.53   | < .001 |
| English articulation                                           | —             | —    | —      | —      | —           | —    | —      | —      | -0.02      | 0.09 | -0.20  | .85    |
| English receptive vocabulary                                   | —             | —    | —      | —      | —           | —    | —      | —      | -0.04      | 0.09 | -0.47  | .64    |
| English receptive grammar                                      | —             | —    | —      | —      | —           | —    | —      | —      | 0.03       | 0.10 | 0.32   | .75    |
| $R^2$                                                          | .39           |      |        |        | .56         |      |        |        | .56        |      |        |        |
| Adjusted $R^2$                                                 | .34           |      |        |        | .51         |      |        |        | .49        |      |        |        |

*Note.* Z scores were used for measures. Dependent variable is the square root of MRVT raw scores.
