# Supplementary material
Source: publisher figshare collection journal article supplement (https://asha.figshare.com/articles/dataset/_/28200128)
Supplement: Supplementary file 10 [file 1]

**Supplemental Material S12.** Linear regression results for Mandarin receptive grammar in 63 Mandarin–English bilingual children.

| Measure                                                        | Initial model |      |       |        | Final model |      |       |        | Full model |      |       |        |
|----------------------------------------------------------------|---------------|------|-------|--------|-------------|------|-------|--------|------------|------|-------|--------|
|                                                                | $\beta$       | SE   | $t$   | $p$    | $\beta$     | SE   | $t$   | $p$    | $\beta$    | SE   | $t$   | $p$    |
| (Intercept)                                                    | 1.93          | 0.09 | 21.85 | < .001 | 1.93        | 0.07 | 27.31 | < .001 | 1.93       | 0.07 | 26.64 | < .001 |
| Age (months)                                                   | 0.12          | 0.11 | 1.11  | .27    | 0.07        | 0.09 | 0.73  | .47    | 0.08       | 0.10 | 0.79  | .43    |
| Nonverbal working memory                                       | 0.22          | 0.10 | 2.16  | .03    | 0.02        | 0.09 | 0.18  | .86    | 0.02       | 0.09 | 0.19  | .85    |
| Difference in number of speakers                               | 0.10          | 0.10 | 1.01  | .32    | -0.02       | 0.09 | -0.24 | .82    | -0.02      | 0.10 | -0.22 | .83    |
| (Mandarin vs. English)                                         |               |      |       |        |             |      |       |        |            |      |       |        |
| Difference in number of native speakers (Mandarin vs. English) | 0.24          | 0.09 | 2.64  | .01    | 0.19        | 0.07 | 2.54  | .01    | 0.20       | 0.08 | 2.52  | .01    |
| Mandarin articulation                                          | —             | —    | —     | —      | —           | —    | —     | —      | 0.05       | 0.10 | 0.44  | .66    |
| Mandarin receptive vocabulary                                  | —             | —    | —     | —      | 0.41        | 0.10 | 4.26  | < .001 | 0.42       | 0.10 | 4.18  | < .001 |
| English articulation                                           | —             | —    | —     | —      | —           | —    | —     | —      | 0.00       | 0.10 | 0.01  | 1.00   |
| English receptive vocabulary                                   | —             | —    | —     | —      | —           | —    | —     | —      | 0.00       | 0.11 | -0.04 | .97    |
| English receptive grammar                                      | —             | —    | —     | —      | 0.20        | 0.08 | 2.51  | .02    | 0.22       | 0.10 | 2.09  | .04    |
| $R^2$                                                          | .31           |      |       |        | .57         |      |       |        | .58        |      |       |        |
| Adjusted $R^2$                                                 | .26           |      |       |        | .53         |      |       |        | .5         |      |       |        |

*Note.* Z scores were used for measures. Dependent variable is the square root of MRGT raw scores.
