# Supplementary material
Source: publisher figshare collection journal article supplement (https://asha.figshare.com/articles/dataset/_/28200128)
Supplement: Supplementary file 11 [file 1]

**Supplemental Material S7.** Linear regression results for English articulation scores in 63 Mandarin–English bilingual children.

| Measure                                                           | Initial model |      |          |          | Final model |      |          |          | Full model |      |          |          |
|-------------------------------------------------------------------|---------------|------|----------|----------|-------------|------|----------|----------|------------|------|----------|----------|
|                                                                   | $\beta$       | SE   | <i>t</i> | <i>p</i> | $\beta$     | SE   | <i>t</i> | <i>p</i> | $\beta$    | SE   | <i>t</i> | <i>p</i> |
| (Intercept)                                                       | 2.85          | 0.16 | 17.34    | < .001   | 2.85        | 0.14 | 20.63    | < .001   | 2.85       | 0.14 | 20.30    | < .001   |
| Age (months)                                                      | -0.33         | 0.20 | -1.63    | .11      | 0.02        | 0.19 | 0.12     | .90      | 0.03       | 0.19 | 0.15     | .88      |
| Nonverbal working memory                                          | -0.25         | 0.19 | -1.34    | .19      | -0.08       | 0.16 | -0.47    | .64      | -0.04      | 0.18 | -0.23    | .82      |
| Difference in number of speakers<br>(Mandarin vs. English)        | 0.14          | 0.18 | 0.78     | .44      | 0.01        | 0.17 | 0.07     | .94      | 0.05       | 0.19 | 0.27     | .79      |
| Difference in number of native speakers<br>(Mandarin vs. English) | -0.17         | 0.17 | -1.01    | .32      | -0.06       | 0.15 | -0.43    | .67      | -0.02      | 0.16 | -0.12    | .90      |
| English receptive vocabulary                                      | —             | —    | —        | —        | -0.46       | 0.16 | -2.88    | .01      | -0.39      | 0.20 | -1.93    | .06      |
| English receptive grammar                                         | —             | —    | —        | —        | —           | —    | —        | —        | -0.07      | 0.21 | -0.32    | .75      |
| Mandarin articulation                                             | —             | —    | —        | —        | 0.63        | 0.16 | 3.97     | < .001   | 0.60       | 0.17 | 3.51     | < .001   |
| Mandarin receptive vocabulary                                     | —             | —    | —        | —        | —           | —    | —        | —        | -0.02      | 0.22 | -0.09    | .93      |
| Mandarin receptive grammar                                        | —             | —    | —        | —        | —           | —    | —        | —        | -0.15      | 0.22 | -0.68    | .50      |
| $R^2$                                                             | .15           |      |          |          | .42         |      |          |          | .43        |      |          |          |
| Adjusted $R^2$                                                    | .09           |      |          |          | .36         |      |          |          | .34        |      |          |          |

*Note.* Z scores were used for measures. Dependent variable is the square root of GFTA-3 raw scores against Singapore English targets.
