# Supplementary material
Source: publisher figshare collection journal article supplement (https://asha.figshare.com/articles/dataset/_/28200128)
Supplement: Supplementary file 12 [file 1]

**Supplemental Material S11.** Linear regression results for English receptive grammar in 63 Mandarin–English bilingual children.

| Measure                                                           | Initial model |      |       |        | Final model |      |       |        | Full model |      |       |        |
|-------------------------------------------------------------------|---------------|------|-------|--------|-------------|------|-------|--------|------------|------|-------|--------|
|                                                                   | $\beta$       | SE   | $t$   | $p$    | $\beta$     | SE   | $t$   | $p$    | $\beta$    | SE   | $t$   | $p$    |
| (Intercept)                                                       | 1.17          | 0.10 | 11.69 | < .001 | 1.17        | 0.08 | 14.99 | < .001 | 1.17       | 0.08 | 14.80 | < .001 |
| Age (months)                                                      | 0.20          | 0.12 | 1.57  | .12    | -0.05       | 0.11 | -0.50 | .62    | -0.05      | 0.11 | -0.47 | .64    |
| Nonverbal working memory                                          | 0.22          | 0.12 | 1.90  | .06    | 0.06        | 0.09 | 0.61  | .54    | 0.05       | 0.10 | 0.47  | .64    |
| Difference in number of speakers<br>(Mandarin vs. English)        | -0.17         | 0.11 | -1.55 | .13    | -0.08       | 0.10 | -0.86 | .40    | -0.09      | 0.10 | -0.89 | .38    |
| Difference in number of native speakers<br>(Mandarin vs. English) | 0.00          | 0.10 | 0.02  | .99    | -0.11       | 0.09 | -1.23 | .22    | -0.11      | 0.09 | -1.23 | .22    |
| English articulation                                              | —             | —    | —     | —      | —           | —    | —     | —      | -0.07      | 0.11 | -0.66 | .51    |
| English receptive vocabulary                                      | —             | —    | —     | —      | 0.37        | 0.09 | 3.98  | < .001 | 0.36       | 0.10 | 3.56  | < .001 |
| Mandarin articulation                                             | —             | —    | —     | —      | -0.19       | 0.09 | -2.14 | .04    | -0.15      | 0.11 | -1.33 | .19    |
| Mandarin receptive vocabulary                                     | —             | —    | —     | —      | —           | —    | —     | —      | 0.05       | 0.12 | 0.38  | .71    |
| Mandarin receptive grammar                                        | —             | —    | —     | —      | 0.28        | 0.10 | 2.88  | .01    | 0.26       | 0.11 | 2.24  | .03    |
| $R^2$                                                             | .17           |      |       |        | .52         |      |       |        | .53        |      |       |        |
| Adjusted $R^2$                                                    | .11           |      |       |        | .46         |      |       |        | .45        |      |       |        |

*Note.* Z scores were used for measures. Dependent variable is the square root of TROG-2 raw scores.
